# Supplementary material
Source: Research Square preprint supplement (doi:10.21203/rs.3.rs-9623509/v1)
Supplement: Supplementary file 1 [file 00602a20f06d7482389b7827.docx]

**Supplementary material 1**

Table Supplementary Material 1. Assumptions of financial models for the production and sales of canarium nuts. NIS stands for nut-in-shell, and KIT stands for kernel-in-testa.

| Parameter (unit) | Value | Reference | Comments |
| --- | --- | --- | --- |
| *Planting system* | | | |
| Project life period (years) | 30 | Harrison and Harrison (2016) |  |
| Spacing (m x m) | 9 x 9 | Thomson and Evans (2006) | Thomson and Evans (2006) suggested 9-10 m x 9-10 m. Key informant from this study recommended 8m x 8 m |
| Infilling rate (%) | 20 | Harrison and Harrison (2016) |  |
| *Yields* | | | |
| Unproductive trees (%) | 10 | Estimate |  |
| Year of first crop | 7 | Harrison and Harrison (2016), Thomson and Evans (2006) |  |
| Yield of first crop (kg NIS tree-1) | 20 | Harrison and Harrison (2016) |  |
| Year it reaches maximum yield | 12 | Harrison and Harrison (2016) |  |
| Maximum annual yield (kg NIS tree-1) | 50 | Evans (1994) | Orwa et al. (2009) and Harrison and Harrison (2016) suggested 100 kg, which seems high based on our discussions with key informants |
| Timber volume at age 30 (m3 tree-1) | 1.5 | Estimate | Vigus (1997) stated that in a 27-30 year-old plantation in Papua New Guinea, a canarium tree can produce 3 m3 of log for export or 2 m3 of sawn timber. However, based on our observations and discussions with key informants, in Vanuatu this is more likely to be between 1.5 and 2 m3 at age 30. |
| KIT-NIS ratio | 0.16 | Carlos and Dawes (1990), (2009), and Wallace et al. (2012) |  |
| Dry-wet KIT ratio | 0.733 | Bunt and Leakey (2008) |  |
| *Labour needs* | | | |
| Land preparation time (min tree-1) | 20 | Harrison and Harrison (2016) |  |
| Whole digging time (min tree-1) | 15 | Harrison and Harrison (2016) |  |
| Planting time (min tree-1) | 3 | Adapted from Harrison and Harrison (2016) | Harrison and Harrison (2016) used 5 min per tree for planting and fertilising. In Vanuatu, fertilising is not practiced, so planting time was reduced to 3 min per tree. |
| Infilling time (min tree-1) | 15 | Harrison and Harrison (2016) |  |
| Weed control time year 1 (min tree-1) | 15 | Harrison and Harrison (2016) |  |
| Weed control time years 2 to 5 (min tree-1) | 10 | Harrison and Harrison (2016) |  |
| Plantation maintenance time years 4 to 30 (min tree-1) | 5 | Harrison and Harrison (2016) |  |
| Nut collection time (min kg-1) | 3.375 | Tungon et al. (2021) |  |
| Nut processing and sorting time (min kg-1) | 6 | Harrison and Harrison (2016) | One of the key informants estimated 1 hour per kilogram of NIS for processing, sorting, depulping and cracking in an inefficient system |
| Nut depulping time (min kg-1) | 10.125 | Tungon et al. (2021) |
| Nut cracking time (min kg-1) | 11.25 | Tungon et al. (2021) |
| Nut drying time – electric dryer (min tonne-1) | 12 | Own data | Tungon et al. (2021)estimated 8.4053 min tonne-1 |
| Nut drying time – solar dryer (min tonne-1) | 16 | Estimate |  |
| *Costs* | | | |
| Land opportunity cost (VUV ha-1 year-1) | 4150 | Harrison and Harrison (2016) |  |
| Labour cost (VUV h-1) | 220 | Minimum wage Vanuatu |  |
| Planting permit cost (VUV) | 100 | Estimate |  |
| Cost of tools and equipment (VUV) | 1140 | Estimate |  |
| Price of seedling (VUV seedling-1) | 300 | Own data |  |
| Nut transportation cost from collection to selling point (VUV kg-1) | 50 | Own data |  |
| Solar dryer cost (VUV) | 25,000 | Own data |  |
| Cost of running and maintaining solar dryer (VUV year-1) | 3420 | Estimate |  |
| Electric dryer cost (VUV) | 11,400 | Estimate |  |
| Cost of running and maintaining electric dryer (VUV year-1) | 1140 | Estimate |  |
| Discount rate (%) | 8 | The discount rate was calculated as the sum of a risk-free discount rate plus a risk premium. The risk-free discount rate chosen was equivalent to long-term government bonds, of 7.58, minus inflation rate of 2.8% (World Bank, 2020). The risk premium for lending for Vanuatu was unavailable, so the value for Fiji of 3.5% was used (World Bank, 2020). The World Bank interest rates are lower than commercial rates, and it would probably only be available to farmers in development projects. The resulting discount rate of 8.28% is consistent with what has been used in the past by Harrison and Harrison (2016) and (Thomson et al., 2011) in Vanuatu, and a rounded figure of 8% will be used in this study. Calculations were done in USD using a conversion rate of USD 1 = VUV 114. | |
| *Price of canarium products* | | | |
| NIS (VUV kg-1) | 30 | Own data | Macdonnel (2017) reported sales for VUV 20 kg-1, while Tungon et al. (2021)assumed VUV 40 kg-1 |
| Fresh KIT (VUV kg-1) | 250 | Macdonnel (2017) | One of the key informants stated prices paid of VUV 300 kg-1 |
| Dry KIT – solar dryer (VUV kg-1) | 350 | Macdonnel (2017) | One of the key informants stated prices paid of VUV 1000 kg-1 |
| Dry KIT – electric dryer (VUV kg-1) | 500 | Estimate | One of the key informants stated prices paid of VUV 1500 kg-1 |
| Timber price (VUV m3) | 4560 | Harrison and Harrison (2016) |  |

References

Bunt, C. & Leakey, R. 2008. Domestication potential and marketing of Canarium indicum nuts in the Pacific: commercialization and market development. Forests, Trees and Livelihoods, 18, 271-289.

Carlos, J. T. & Dawes, S. 1990. South Pacific tropical nut cultivation: status and outlook, IRETA.

Evans, B. R. Overview of Resource Potential for Indigenous Nut Production in South Pacific Indigenous Nuts. In: Steven, M. L., Bourke, R. M. & Evans, B. R., eds. South Pacific Indigenous Nuts, 1994 Port Vila, Vanuatu. ACIAR, 10-35.

Harrison, S. & Harrison, R. 2016. Financial models of multi-species agroforestry systems in Fiji and Vanuatu. In: Harrison, S. & Karim, S. (eds.) Promoting sustainable agriculture and agroforestry to replace unproductive land use in Fiji and Vanuatu. Canberra, Australia: Australian Centre for International Agricultural Research.

Macdonnel, P. 2017. Enhancing returns from high-value agroforestry species in Vanuatu. Field Report FR/PM/2017-11. Australia.

Orwa, C., Mutua, A., Kindt, R., Jamnadass, R. & Anthony, S. 2009. Agroforestree Database: a tree reference and selection guide version 4.0 [Online]. Available: http://www.worldagroforestry.org/sites/treedbs/treedatabases.asp [Accessed 11 May 2020].

Thomson, L. a. J., Doran, J., Harbaugh, D. & Merlin, M. D. 2011. Farm and Forestry Production and Marketing Profile for Sandalwood (Santalum species). In: Elevitch, C. R. (ed.) Specialty Crops for Pacific Island Agroforestry. Holualoa, Hawaii: Permanent Agriculture Resources.

Thomson, L. a. J. & Evans, B. 2006. Canarium indicum var. indicum and C. harveyi (canarium nut), ver 2.1. In: Elevitch, C. R. (ed.) Species Profile for Pacific Island Agroforestry. Holualoa, Hawaii: Permanent Agriculture Resources.

Tungon, J., Grant, E., Macdonell, P., Page, T., Wallace, H., Bai, S. H., Randall, B., Johns, C., Simos, T., Jones, K., Nevenimo, T., Hannet, D. & Hannett, G. 2021. Canarium Producers Manual. Tachnical Note TN/C-01, FST/2016/154 ed. Australia: ACIAR.

Vigus, T. 1997. Some silvicultural aspects of Canarium indicum. In: Kandrian Gloucester Integrated Development Project (ed.) Workshop on Galip as a commercial industry in PNG. Canberra, Australia: AusAID.

Wallace, H., Carter, J., Austin, J., Poienou, M., Moxon, J., Walton, D., Randall, B. & Viji, I. 2012. Processing of Canarium indicum nuts: Adapting and refining techniques to benefit farmers in the South Pacific (Final report). In: Australian Centre for International Agricultural Research (ed.). Canberra.

World Bank 2020. World Bank Data Catalog. World Bank Group.
